# Supplementary material for: Follicular T cells are clonally and transcriptionally distinct in B cell-driven mouse autoimmune disease
Source: PubMed Central journal article supplement (PMC8602266; doi:10.1038/s41467-021-27035-8), 2021-11-18
Supplement: 41467_2021_27035_MOESM1_ESM.pdf [file 41467_2021_27035_MOESM1_ESM.pdf]

**Follicular T Cells are Clonally and Transcriptionally Distinct in B Cell-Driven  
Autoimmune Disease**

Elliot H Akama-Garren, Theo van den Broek, Lea Simoni, Carlos Castrillon, Cees E. van  
der Poel, Michael C Carroll

**Supplementary Information**

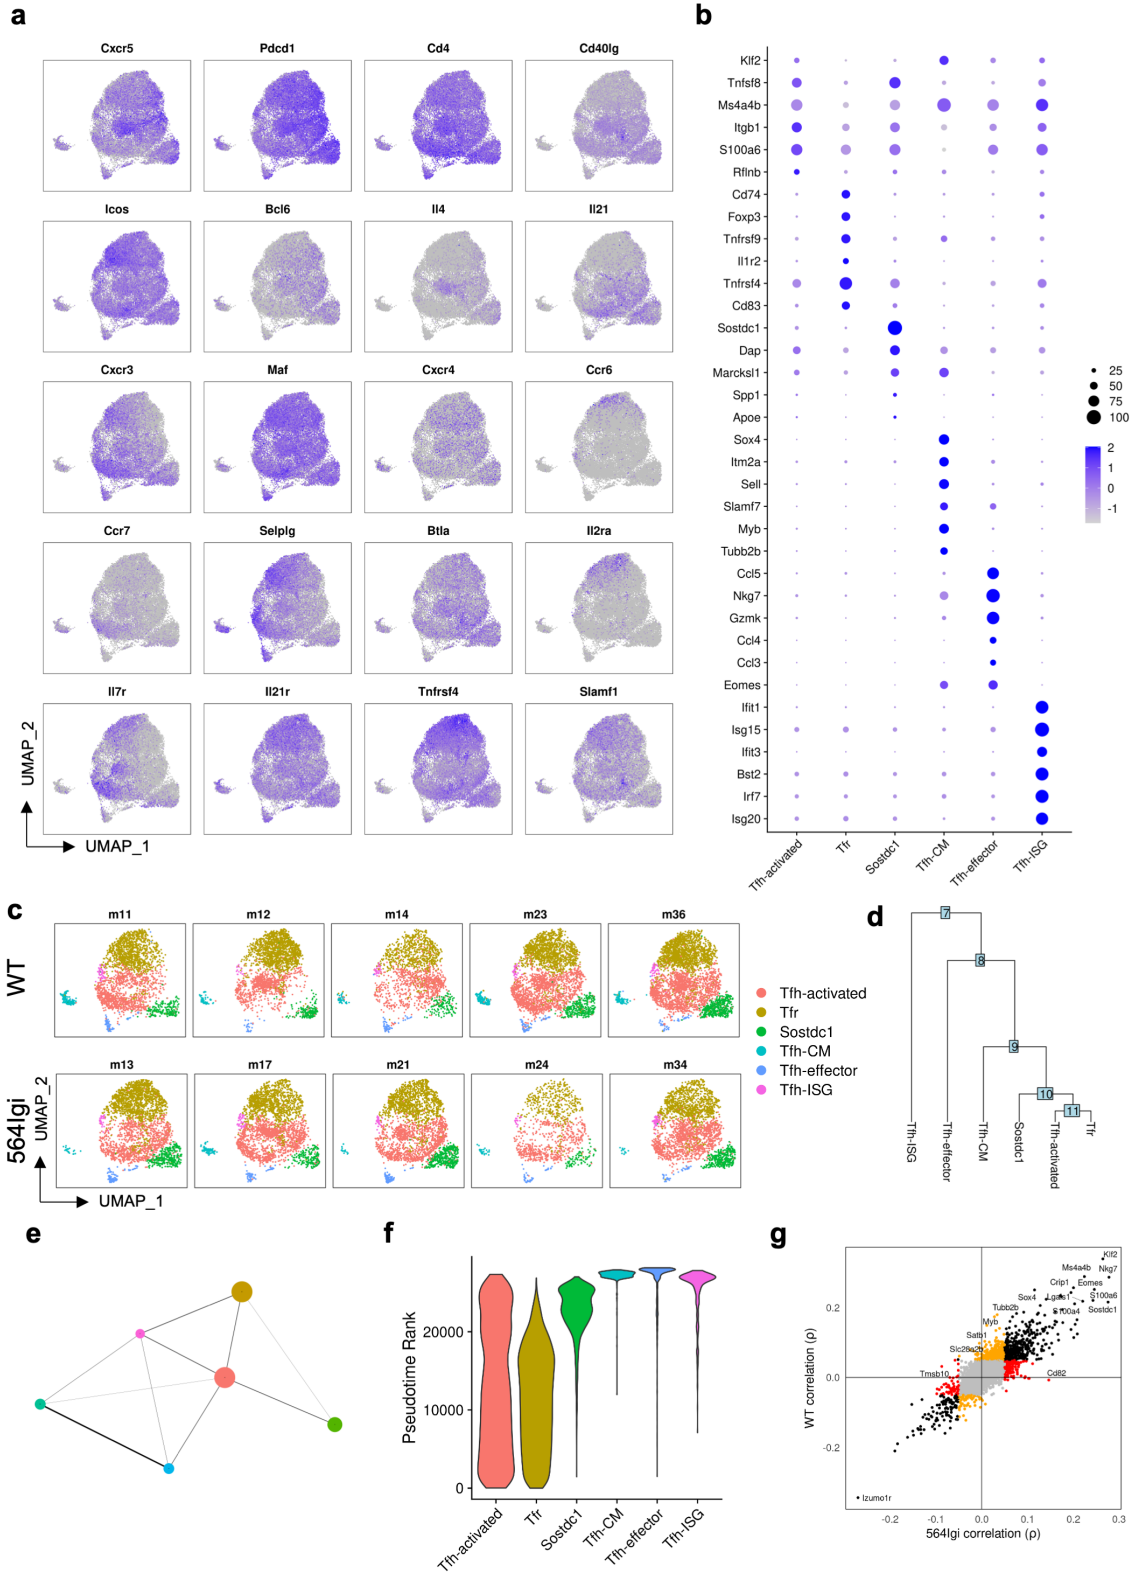

**Supplementary Fig. 1. Clustering is similar between autoimmune and non-autoimmune samples.**

**a**, Gene expression of Tfh and Tfr defining genes projected onto UMAP of follicular T cells.

**b**, Dot plot of averaged log-normalized expression of top six differentially expressed genes (rows) for each cluster (columns). Size represents percentage of cells in cluster expressing gene.

**c**, UMAPs of follicular T cells split by individual samples of wild type (top) or autoimmune (bottom) chimeras, colored by cluster.

**d**, Hierarchical clustering of follicular T cell clusters.

**e**, Trajectory analysis computed using PAGA graph of paths between clusters.

**f**, Ranked pseudotime values of cells within clusters.

**g**, Scatter plot comparing correlation of gene expression with pseudotime values between WT or mixed 564lgi chimera follicular T cells.

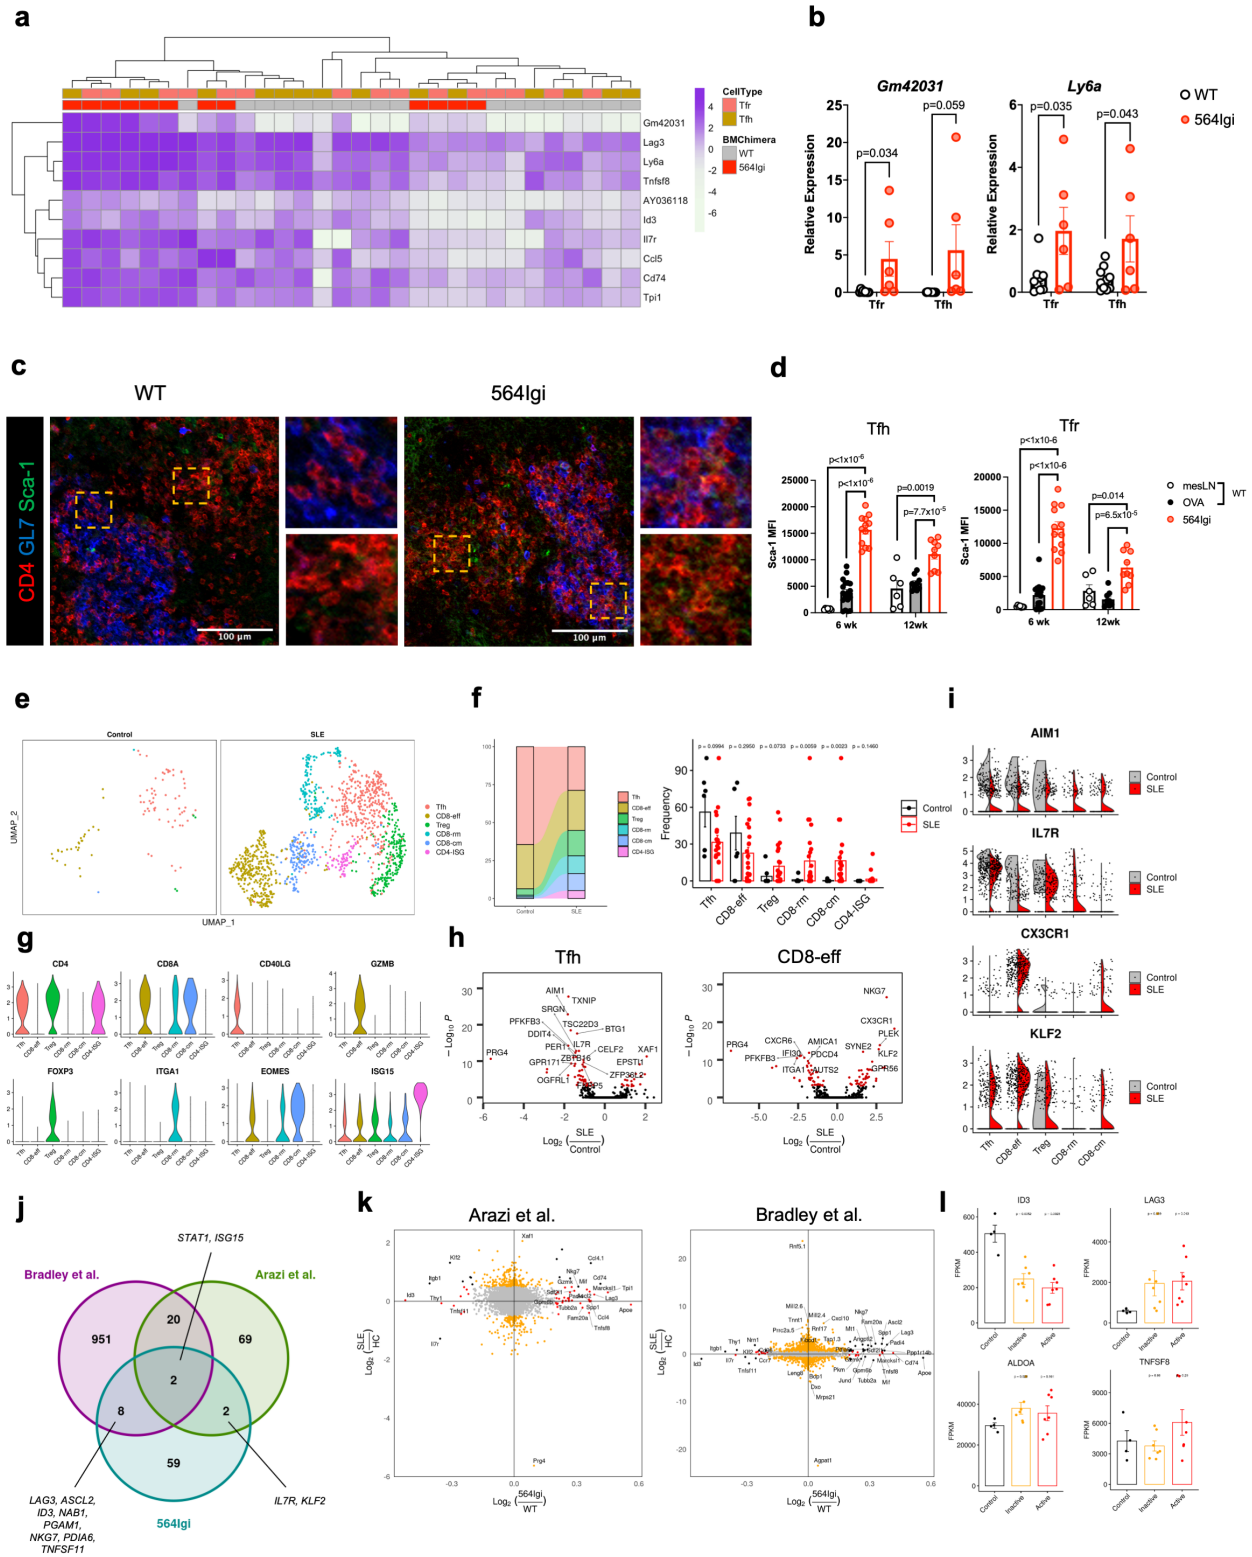

**Supplementary Fig. 2. Follicular T cells are transcriptionally distinct in lupus patients.**

**a,** Gene expression of candidate genes (rows) in Tfh (CD3<sup>+</sup>CD4<sup>+</sup>CXCR-5<sup>+</sup>PD-1<sup>+</sup>GITR<sup>-</sup>) and Tfr (CD3<sup>+</sup>CD4<sup>+</sup>CXCR-5<sup>+</sup>PD-1<sup>+</sup>GITR<sup>+</sup>) cells (columns) sorted from WT (grey, *n* = 9) or mixed 564lgi (red, *n*= 6) chimeras as measured by qRT-PCR. Unbiased hierarchical clustering of samples and genes shown. Gene expression is log-normalized relative to *Ywhaz*.

**b,** Expression of indicated genes in Tfh and Tfr cells sorted from WT (grey, *n* = 9) or mixed 564lgi (red, *n*= 6) chimeras as measured by qRT-PCR. P-value computed using two-tailed Student's *t*-test.

**c,** Confocal microscopy of spleens from WT (black, *n* = 9) or mixed 564lgi (red, *n* = 10) chimeras stained for CD4 (red), germinal centers (GL-7, blue), and Sca-1 (green). Insets(right) show higher magnification.

**d,** Flow cytometry quantification of Sca-1 expression in Tfh and Tfr cells from WT mesenteric lymph nodes (black circles, *n* = 7 for 6 weeks, *n* = 6 for 12 weeks), WT mice immunized with NP-OVA for indicated lengths (black, *n* = 16 for 6 weeks, *n* = 9 for 12 weeks), or 564lgi (red, *n* = 12 for 6 weeks, *n* = 9 for 12 weeks) mice at indicated ages. MFI, median fluorescence intensity. P-value computed using two-tailed Student's *t*-test.

**e,** UMAP visualization of T cells from renal biopsies of healthy control (left, *n* = 7) or systemic lupus erythematosus (SLE, right, *n* = 24) patients colored by unbiased cluster assignment. Raw scRNA-seq data obtained from Immport SDY997.

**f,** Stacked bar graph (left) and per sample average (right) of percent of T cells belonging to each cluster between healthy control (black) and SLE (red) patients.

**g**, Expression of cluster-defining genes within individual clusters.

**h**, Volcano plots of differentially expressed genes between control and SLE renal biopsy T cells within indicated clusters. Adjusted P-value  $<0.001$  and  $\log_2FC >0.5$  shown in red. Differential expression computed by MAST and adjusted for multiple comparison based on Bonferroni correction.

**i**, Expression of indicated genes within individual clusters amongst renal biopsy T cells split by control (grey) or SLE (red) samples.

**j**, Venn diagram comparing differentially expressed genes between  $CD4^+$  PBMCs from healthy and SLE patients (Bradley et al.), between renal biopsy T cells from healthy and SLE patients (Arazi et al.), and between splenic follicular T cells from wild type and mixed 564lgi chimeras (564lgi). Mouse genes were converted to human orthologs where possible.

**k**, Scatter plot comparing log fold change of gene expression between mixed 564lgi and WT chimera follicular T cells with log fold change of gene expression between Tfh cells from SLE and healthy samples from renal biopsies (Arazi et al.) or  $CD4^+$  PBMCs (Bradley et al.).

**l**, FPKM of indicated genes from RNA-sequencing of  $CD4^+$  PBMCs from control (black,  $n = 4$ ), inactivate (SLEDAI  $\leq 6$ , orange,  $n = 7$ ), and active (SLEDAI  $>6$ , red,  $n = 7$ ) SLE patients.

Data are represented as mean  $\pm$  SEM. Source data are provided as a Source Data file.

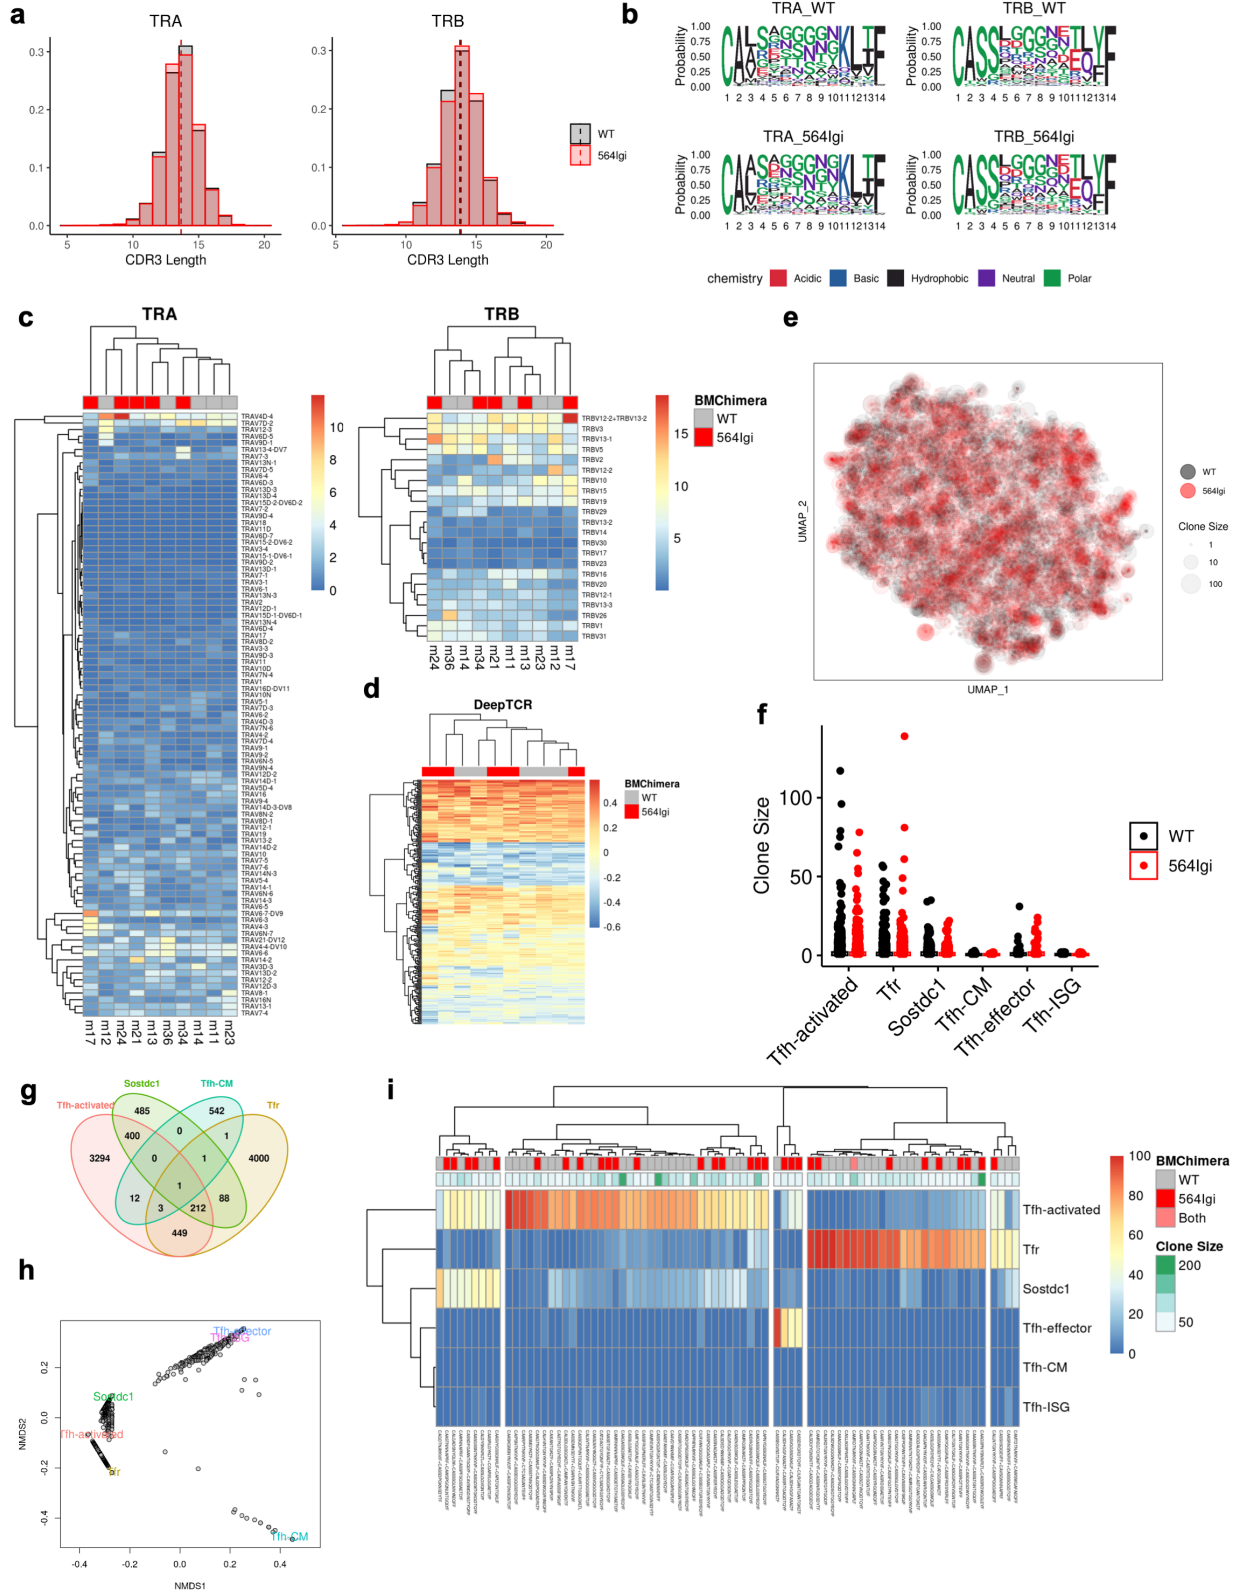

**Supplementary Fig. 3. Clonotypes are infrequency shared between follicular T cell clusters.**

**a,** Distribution of CDR3 length of TCR $\alpha$  (left) and TCR $\beta$  (right) chains of follicular T cells from WT (black) or mixed 564Igi (red) chimeras. Dashed vertical line indicates mean.

**b,** Motif analysis of 14 amino acid long CDR3s of TCR $\alpha$  (left) and TCR $\beta$  (right) chains of follicular T cells from WT (top) or mixed 564Igi (bottom) chimeras.

**c,** Hierarchical clustering of samples (columns) based on variable gene usage (rows) in TCR $\alpha$  (left) or TCR $\beta$  (right) chains. Row labels indicate variable gene name and column color indicates sample condition (grey, WT; red, 564Igi).

**d,** Hierarchical clustering of samples (columns) based on learned variable autoencoder-based feature space (rows) of TCR repertoires from WT (grey) or mixed 564Igi (red) chimeras.

**e,** UMAP visualization learned from TCR repertoire featurization performed on WT (black) and mixed 564Igi (red) chimeras. Individual clonotypes are depicted as circles and sized according to number of cells belonging to given clonotype. Points are colored according to condition.

**f,** Number of individual cells belonging to each clonotype within follicular T cell clusters identified by scRNA-seq amongst WT (black) or mixed 564Igi (red) chimeras.

**g,** Venn diagram comparing number of unique and shared clonotypes between follicular T cell clusters identified by scRNA-seq.

**h,** Ordinance plot of non-metric multidimensional scaling (NMDS) of clonotype distribution amongst individual samples. Text indicates sample name and color



indicates sample condition (grey, WT; red, 564Igi). Individual clonotypes are depicted as grey circles.

i, Hierarchical clustering of expanded clonotypes (>30 individual cells, columns) based on cluster distribution (rows). Column colors indicate sample condition of given clonotype (grey, WT; red, 564Igi; light red, both) and number of individual cells belonging to each clonotype. Columns are labeled with CDR3 sequences from TCR $\alpha\beta$  pairings.

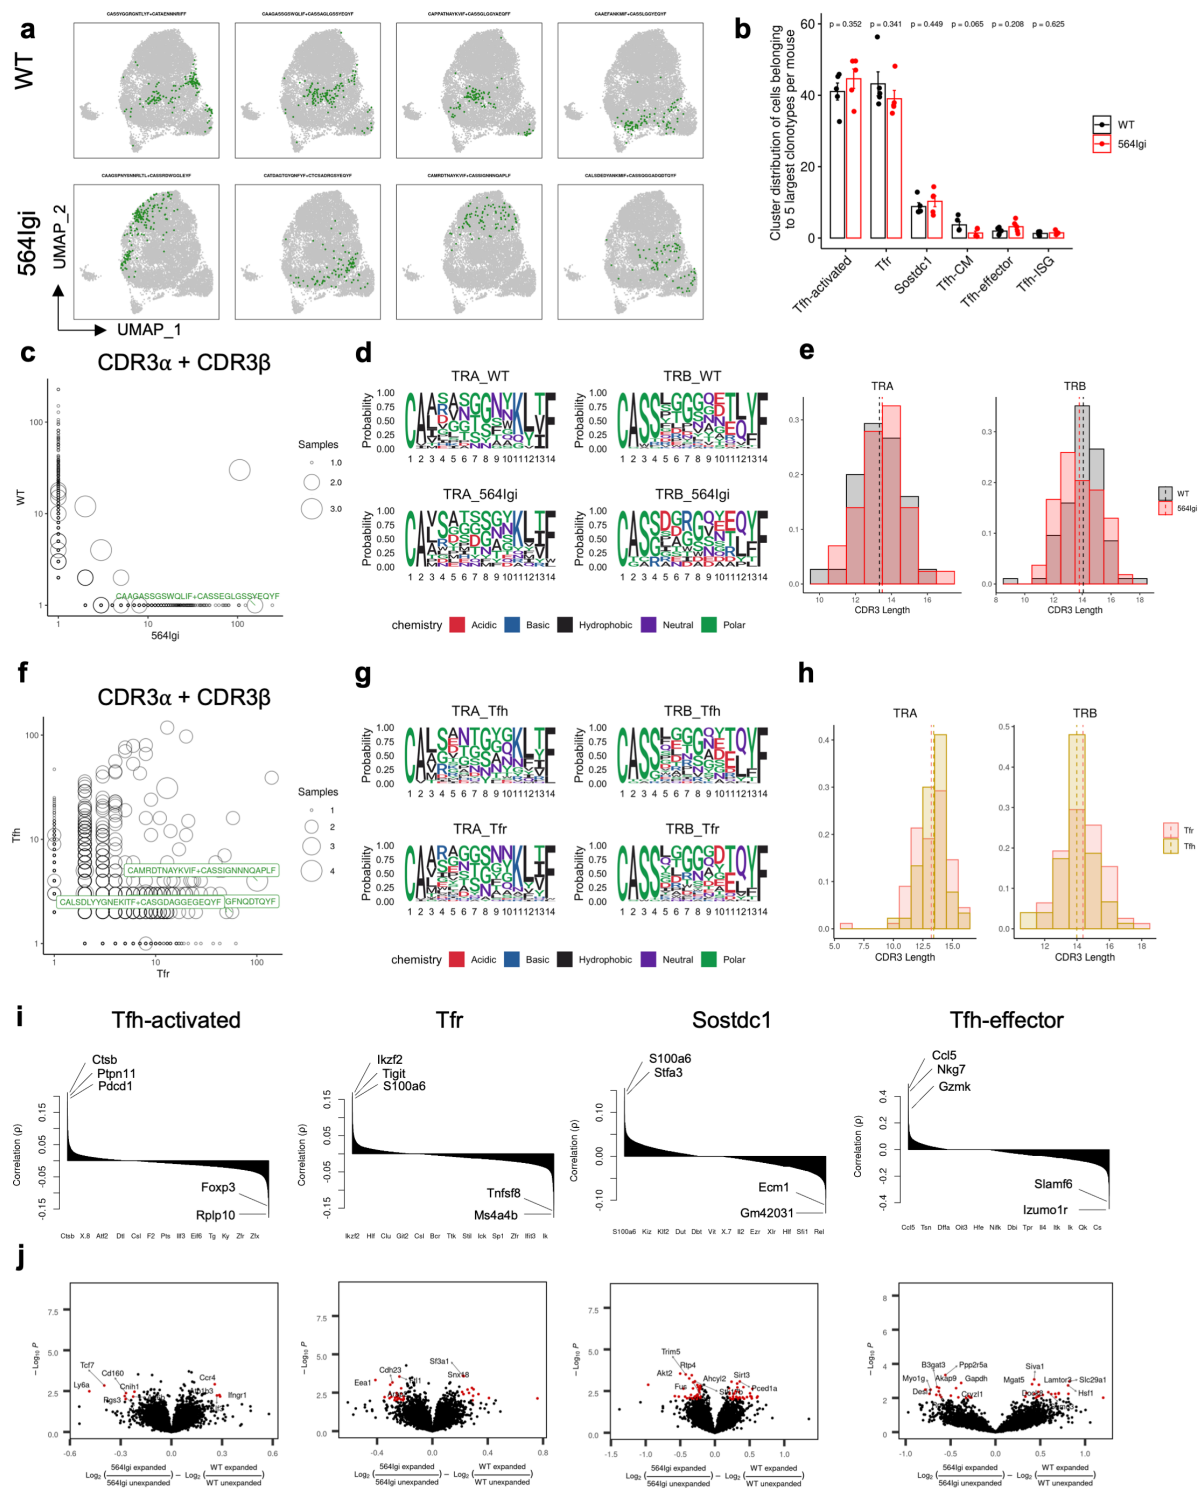

**Supplementary Fig. 4. Clonal expansion amongst clusters is similar between autoimmune and non-autoimmune samples.**

**a,** Mappings of four largest clonotypes in WT (top) or mixed 564Igi (bottom) chimeras onto UMAP visualization of transcriptomic data. CDR3 sequences of TCR $\alpha\beta$  pairing of given clonotype indicated above each plot.

**b,** Percent of cells belonging to five largest clonotypes in each mouse assigned to each cluster in WT (top,  $n = 5$ ) or mixed 564Igi (bottom,  $n = 5$ ) chimeras. Data are represented as mean  $\pm$  SEM. P-value computed using two-tailed Student's *t*-test.

**c,** Scatter plot comparing clone size between WT and mixed 564Igi chimeras with selected clonotypes labeled with CDR3 sequences from TCR $\alpha\beta$  pairings. Clonotype size represents number of samples in which the given clonotype is observed.

**d,** Motif analysis of 14 amino acid long CDR3s of TCR $\alpha$  (left) and TCR $\beta$  (right) chains of cells belonging to preferentially expanded clonotypes indicated in Fig. 4b from WT (top) or mixed 564Igi (bottom) chimeras.

**e,** Distribution of CDR3 length of TCR $\alpha$  (left) and TCR $\beta$  (right) chains of cells belonging to preferentially expanded clonotypes indicated in Fig. 4b from WT (black) or mixed 564Igi (red) chimeras. Dashed vertical line indicates mean.

**f,** Scatter plot comparing clone size between Tfr and Tfh cells identified by scRNA-seq labeled with CDR3 sequences from TCR $\alpha\beta$  pairings. Clonotype size represents number of samples in which the given clonotype is observed.

**g,** Motif analysis of 14 amino acid long CDR3s of TCR $\alpha$  (left) and TCR $\beta$  (right) chains of Tfh (top) or Tfr (bottom) cells identified by scRNA-seq.

**h**, Distribution of CDR3 length of TCR $\alpha$  (left) and TCR $\beta$  (right) chains of Tfh or Tfr cells.

Dashed vertical line indicates mean.

**i**, Rank order plot of correlation coefficients of each gene with clone size across cells assigned to indicated cluster by scRNA-seq.

**j**, Volcano plots of differences between mixed 564Igi and WT chimeras in gene enrichment between expanded (>5 individual cells) and unexpanded (1 individual cell) clonotypes within indicated cluster. Adjusted P-value <0.01 and log<sub>2</sub>FC >0.2 shown in red. Differential expression computed by MAST and adjusted for multiple comparison based on Bonferroni correction.

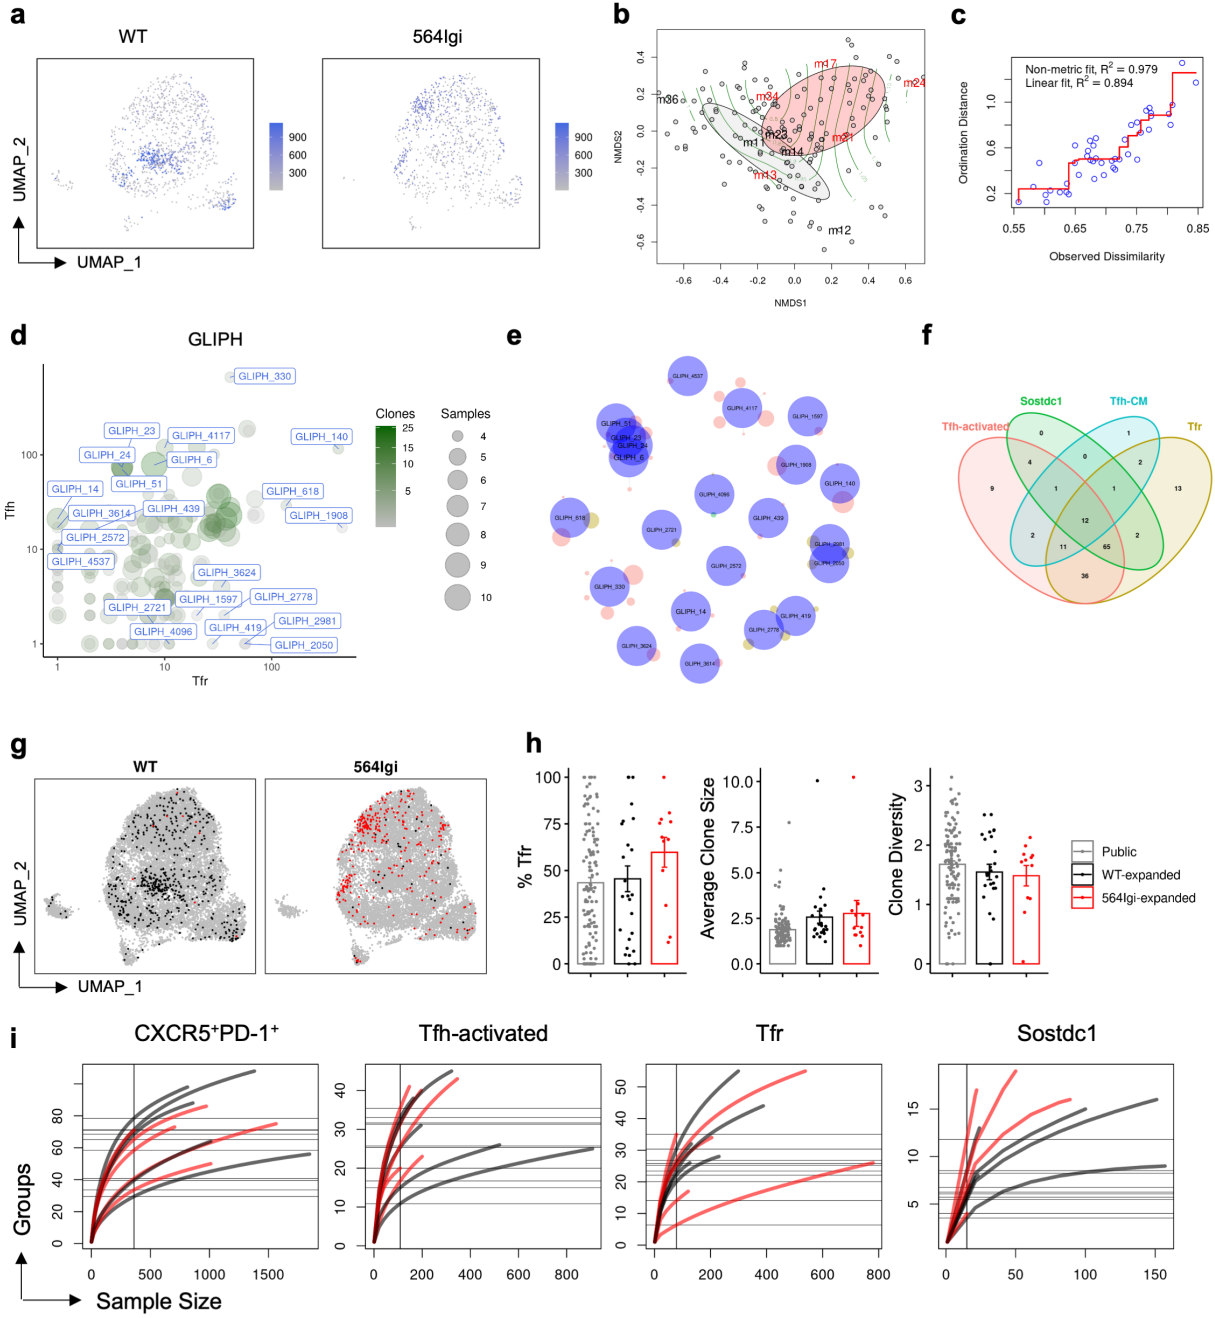

**Supplementary Fig. 5. GLIPH analysis predicts frequent cross-reactivities between follicular T cell clusters.**

**a**, Total size of specificity groups mapped onto UMAP visualization of transcriptomic data of individual follicular T cells from WT (left) or mixed 564Igi (right) mice.

**b**, Ordinance plot of non-metric multidimensional scaling (NMDS) of specificity group distribution amongst individual samples. Text indicates sample name and color indicates sample condition (grey, WT; red, 564Igi). Individual specificity groups are depicted as grey circles.

**c**, Shepard plot of ordination distances from non-metric multidimensional scaling (NMDS) of specificity group distribution amongst individual samples in **(b)**.

**d**, Scatter plot comparing specificity group size between Tfr and Tfh cells. Specificity groups are colored according to the number of unique clonotypes that belong to a given specificity group and sized according to number of samples in which the given specificity group is observed. Select specificity groups are labeled with their arbitrary name in blue.

**e**, Unweighted network analysis of clonotype assignment to indicated specificity groups. Specificity groups are depicted as blue circles, clonotypes are colored according to most frequently assigned cluster and sized according to number of cells belonging to given clonotype.

**f**, Venn diagram comparing number of unique and shared specificity group between follicular T cell clusters identified by scRNA-seq.

**g**, Mappings of cells belonging to specificity groups preferentially expanded ( $|\log_2FC| > 2.5$  and total size  $> 10$ ) in WT (black) or mixed 564Igi (red) chimeras onto

UMAP visualization of transcriptomic data from WT (left) or mixed 564Igi (right) chimeras.

**h**, Percentage of cells assigned to the Tfr cluster within each specificity group (left), geometric mean of clone sizes of clonotypes within each specificity group (middle), and Shannon diversity index of clonotype expansion within given specificity group (right) between specificity groups without a condition preference (public, grey,  $n = 121$ ) or preferentially expanded in WT (black,  $n = 26$ ) or mixed 564Igi (red,  $n = 12$ ) chimeras. Data are represented as mean  $\pm$  SEM.

**i**, Rarefaction curves of specificity group richness within follicular T cell clusters identified by scRNA-seq. Individual samples are depicted by lines and colored by sample condition (black, WT; red, 564Igi).

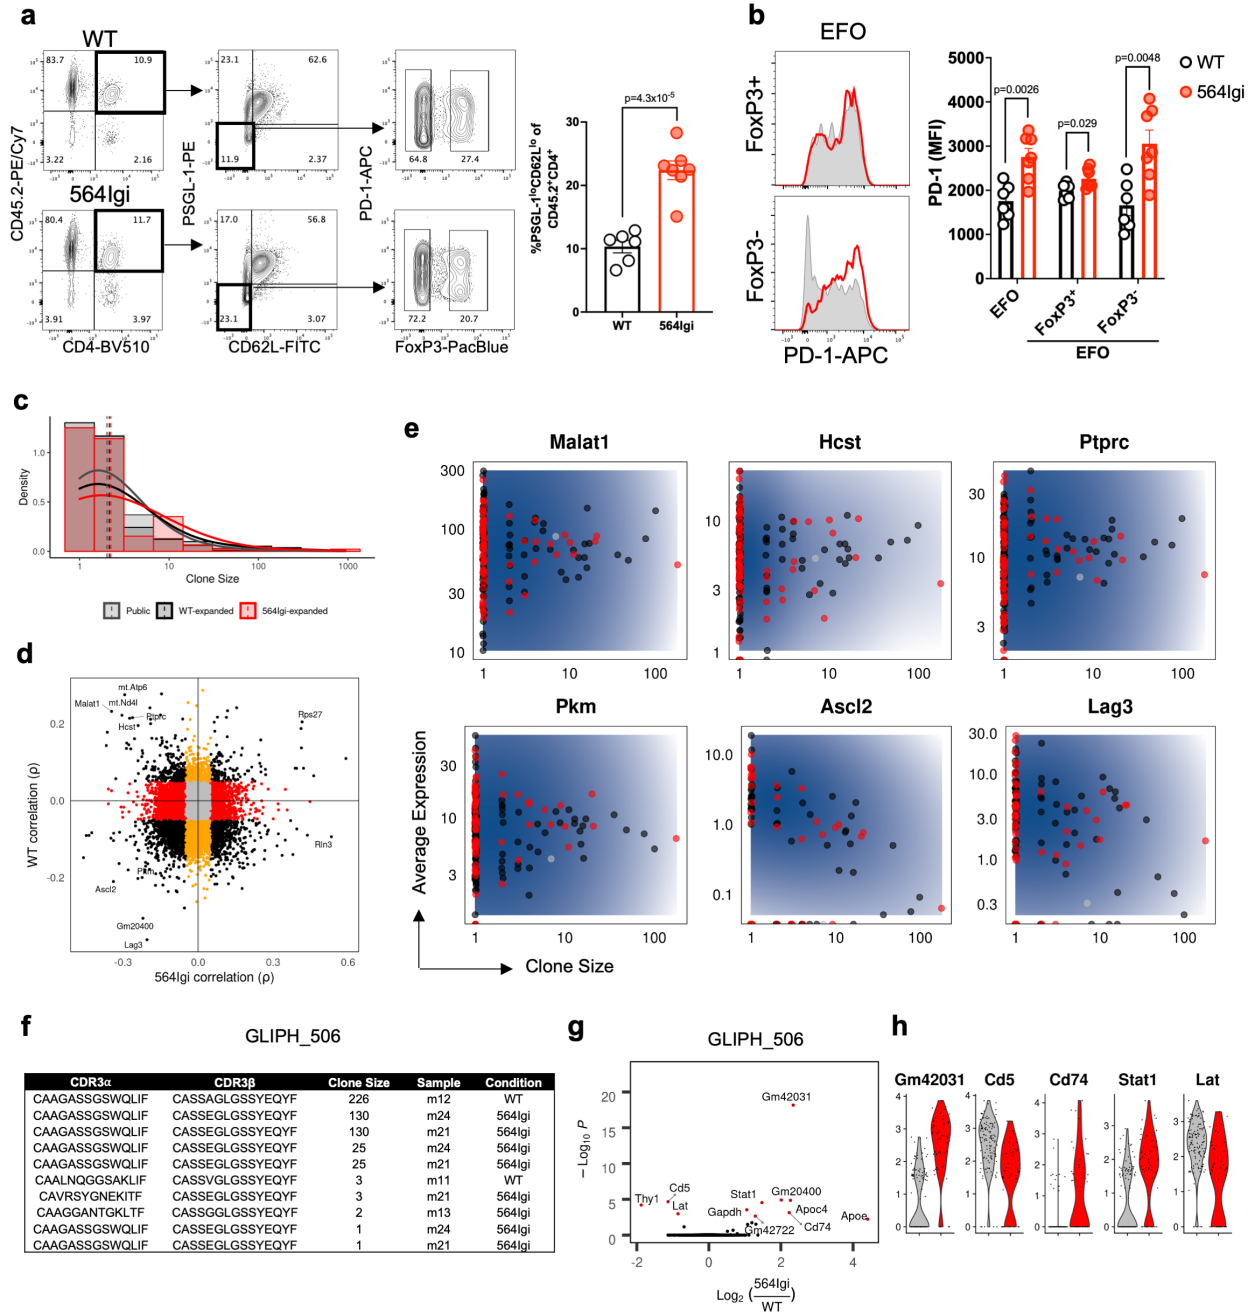



**Supplementary Fig. 6. Autoimmune follicular T cells are transcriptionally distinct within a shared TCR specificity group.**

**a,** Gating strategy (left) and quantification (right) to identify extrafollicular (EFO) CD4<sup>+</sup> T cells from WT (black,  $n = 6$ ) or mixed 564Igi (red,  $n = 7$ ) chimeras. Data are represented as mean  $\pm$  SEM. P-value computed using two-tailed Student's *t*-test.

**b,** Flow cytometry histograms (left) and quantification (right) of PD-1 expression in EFO CD4<sup>+</sup> T cells from WT (black,  $n = 6$ ) or mixed 564Igi (red,  $n = 7$ ) chimeras. Data are represented as mean  $\pm$  SEM. P-value computed using two-tailed Student's *t*-test.

**c,** Distribution of clone sizes amongst clonotypes belonging to specificity groups without a condition preference (public, grey) or preferentially expanded in WT (black) or mixed 564Igi (red) chimeras. Vertical lines indicate geometric means.

**d,** Scatter plot comparing correlation coefficients of each gene with clone size between WT and mixed 564Igi chimeras amongst cells belonging to specificity groups preferentially expanded in WT or mixed 564Igi chimeras. Correlation coefficients  $>0.05$  are indicated in black (correlated in both conditions), red (correlated in mixed 564Igi chimera specificity groups only), or red (correlated in WT chimera specificity groups only).

**e,** Average expression of indicated gene amongst all cells belonging to individual clonotypes belonging to specificity groups preferentially expanded in WT or mixed 564Igi chimeras versus clone size. Clonotype color indicates sample condition (black, WT; red, 564Igi).

**f**, CDR3 sequences of clonotypes belonging to specificity group “GLIPH\_506”.

Conserved motif residues are highlighted, low contact probability residues indicated in red.

**g**, Volcano plot of differentially expressed genes between cells from mixed 564Igi versus WT chimera belonging to specificity group “GLIPH\_506”. Adjusted P-value  $<0.01$  and  $\log_2FC >0.2$  shown in red. Differential expression computed by MAST and adjusted for multiple comparison based on Bonferroni correction.

**h**, Violin plot of expression of indicated genes in cells belonging to specificity group “GLIPH\_506” in WT (grey) or mixed 564Igi (red) chimeras.

Source data are provided as a Source Data file.

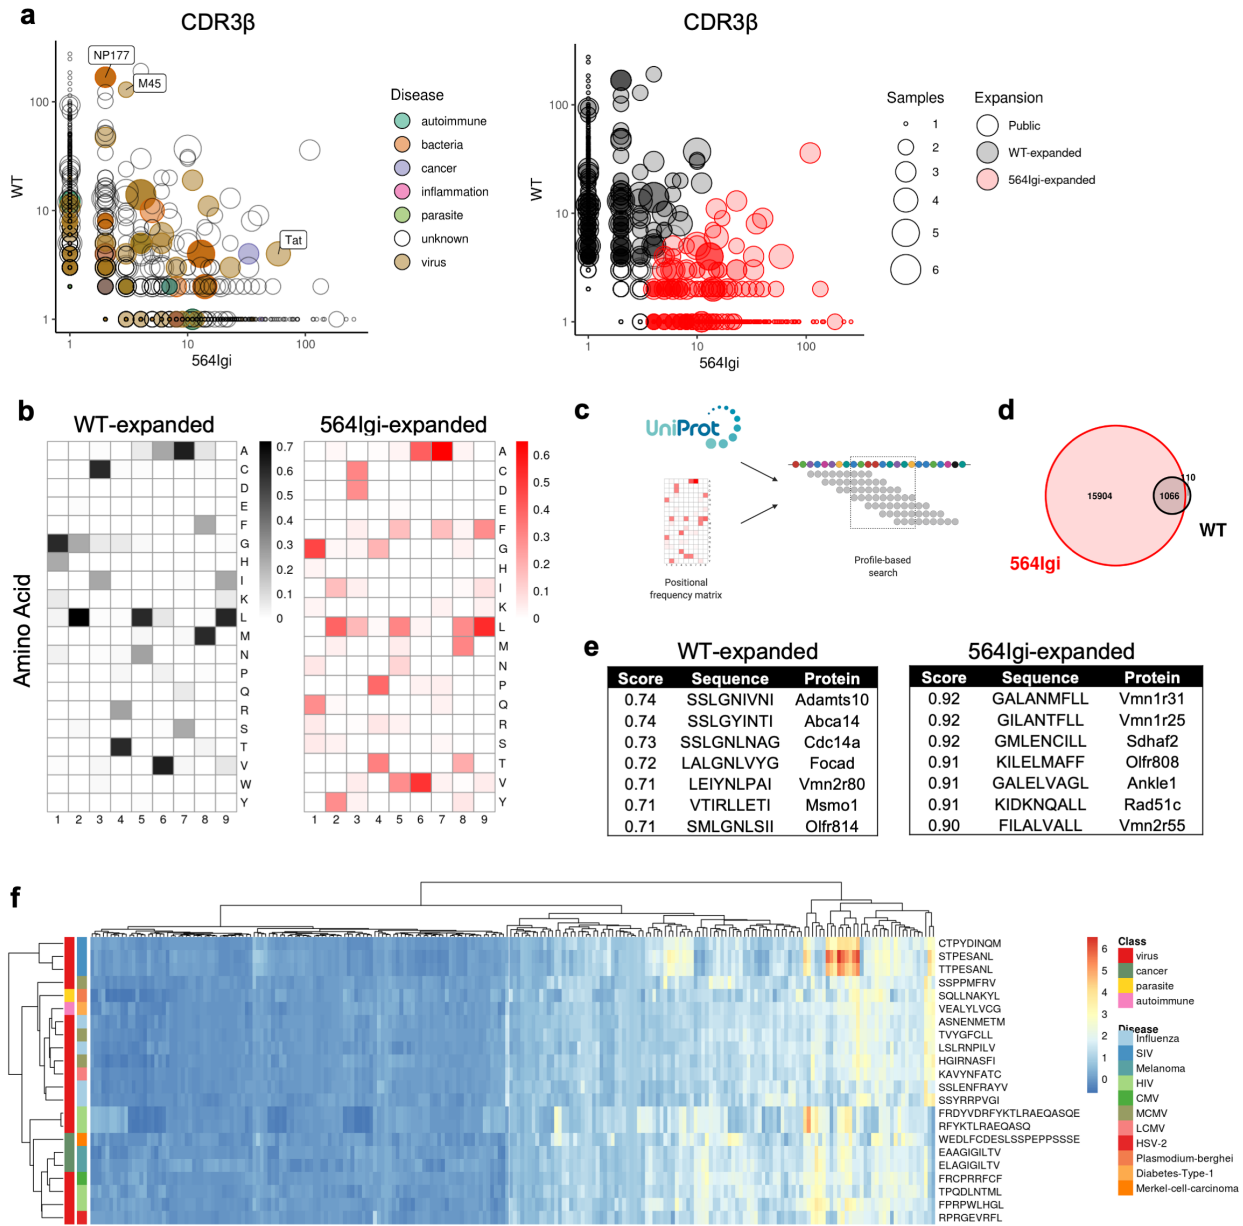

**Supplementary Fig. 7. Position-weighted search of protein databases based on known CDR3 $\beta$  specificities.**

**a,** Scatter plot comparing CDR3 $\beta$  based clonotype size between WT and mixed 564Igi chimeras and colored according to disease category of predicted peptide from TCR database search of annotated CDR3 $\beta$  sequences (left) or preferential expansion ( $|\log_2FC| > 3$  and total size  $> 10$ ) in WT (black) or mixed 564Igi (red) chimeras (right). Size represents number of samples in which the given CDR3 $\beta$  sequence is observed. Labels represent antigens for selected CDR3 $\beta$  sequences present in our annotated TCR database.

**b,** Positional weighted matrix (PWM) of amino acid preference amongst nine amino acid long peptides corresponding to annotated CDR3 $\beta$  sequences from TCR databases that are identical to CDR3 $\beta$  clonotypes preferentially expanded in WT (left) or mixed 564Igi (right) chimeras identified by scRNA-seq. Peptides were weighted according to clone size multiplied by fold enrichment in given condition.

**c,** Schematic of PWM-based scoring of the mouse proteome to search for novel candidate peptides based on CDR3 $\beta$  annotation from **(b)**.

**d,** Venn diagram of candidate antigens from the mouse proteome PWM-based search using annotated CDR3 $\beta$  clonotypes preferentially expanded in WT (black) or mixed 564Igi (red) chimeras.

**e,** Seven highest scoring peptides from the mouse proteome PWM-based search using annotated CDR3 $\beta$  clonotypes preferentially expanded in WT (left) or mixed 564Igi (right) chimeras.

**f**, Hierarchical clustering of annotated peptides (rows) based on learned feature space (columns) of CDR3 $\beta$  sequences from TCR databases using supervised training in Fig. 7G. Only peptides with AUC >0.9 are displayed. Row colors indicate disease class and disease information of given peptide.

**Supplementary Table 1. Metadata and sequencing depth of scRNA-seq and scTCR-seq performed on wild type (WT) and mixed autoimmune (564Igi) bone marrow chimeras.**

| Mouse | Gender | Condition | scRNA-seq |                |                |                 | scTCR-seq |                |                 |                    |           |
|-------|--------|-----------|-----------|----------------|----------------|-----------------|-----------|----------------|-----------------|--------------------|-----------|
|       |        |           | Cells     | Reads per cell | Genes per cell | Reads (million) | Cells     | Reads per cell | Reads (million) | $\alpha\beta$ Pair | Diversity |
| m14   | M      | WT        | 19148     | 15724          | 577            | 301.083152      | 6245      | 3384           | 21.13308        | 63.10%             | 539.7     |
| m17   | M      | 564Igi    | 6476      | 26083          | 1475           | 168.913508      | 4591      | 4832           | 22.183712       | 82.90%             | 118.5     |
| m11   | F      | WT        | 5399      | 27779          | 1500           | 149.978821      | 4757      | 11962          | 56.903234       | 82.50%             | 350.36    |
| m12   | F      | WT        | 4427      | 25186          | 1325           | 111.498422      | 3765      | 6591           | 24.815115       | 82.60%             | 77.78     |
| m24   | M      | 564Igi    | 3537      | 44891          | 980            | 158.779467      | 2642      | 12051          | 31.838742       | 77.50%             | 135.67    |
| m13   | F      | 564Igi    | 4756      | 21583          | 1551           | 102.648748      | 4084      | 8068           | 32.949712       | 86.80%             | 361.89    |
| m23   | M      | WT        | 8269      | 21978          | 1228           | 181.736082      | 5638      | 7392           | 41.676096       | 83.30%             | 189.82    |
| m21   | F      | 564Igi    | 7352      | 23236          | 1082           | 170.831072      | 5105      | 9933           | 50.707965       | 78.80%             | 279.32    |
| m34   | F      | 564Igi    | 5027      | 30402          | 1368           | 152.830854      | 3155      | 21882          | 69.03771        | 67.90%             | 182.8     |
| m36   | M      | WT        | 6840      | 26807          | 1361           | 183.35988       | 3914      | 16370          | 64.07218        | 66.40%             | 165.11    |

**Supplementary Table 2. Primers for genotyping.**

| <b>Primer name</b> | <b>Sequence</b>       |
|--------------------|-----------------------|
| 564Igi_H2_F        | CACAGATTCTTAGTTTTTCAA |
| 564Igi_H2_R        | TGGAGCTATATCATCCTCTTT |
| 564Igi_K_F         | CCAGTGCAGATTTTCAGCTTC |
| 564Igi_K_R         | CAGCTTGGTCCCAGCACCGAA |
| mRPP30_F           | TGACCCTATCAGAGGACTGC  |
| mRPP30_R           | CTCTGCAATTTGTGGACACG  |

**Supplementary Table 3. Primers for qRT-PCR.**

| <b>Primer name</b> | <b>Sequence</b>           |
|--------------------|---------------------------|
| AY036118_F         | CCAGCCAACGTAGAAAAGCC      |
| AY036118_R         | GCTCTTCCGTGTCTACGAGG      |
| Ccl5_F             | CTCACCATATGGCTCGGACACC    |
| Ccl5_R             | GCGGTTCTTCGAGTGACAA       |
| Cd74_F             | ACTCCATGGATGGCGTGAAC      |
| Cd74_R             | TTCTTCCTGGCACTTGGTCAG     |
| Gm42031_F          | AGCTCGACTGCCAACAAGGAG     |
| Gm42031_R          | CAAAAAGCTGCTCCCATCGGT     |
| Id3_F              | TTCCGAGAATGGGGTGTGCG      |
| Id3_R              | ATCAGGGCAGCAGAGCTTTT      |
| Il7r_F             | CTGTCTTGCCAAGTGTCCACC     |
| Il7r_R             | TTCAGACTATAGTTGTTCCAGAGTT |
| Lag3_F             | GTAGCATCCATCTGCAGGGAC     |
| Lag3_R             | CAGATGCCGGGGTTACCTCA      |
| Ly6a_F             | CTCCCTCTTCAGGATGCCAG      |
| Ly6a_R             | GCACAGATAAAACCTAGCAGCTC   |
| Tnfsf8_F           | CCAGAAAAAGGACTCCACTCCA    |
| Tnfsf8_R           | ACTTGGAGGTAGGCCCATGA      |
| Tpi1_F             | GCCTGGGAGAACTCATCTGC      |
| Tpi1_R             | GCTTCTGTCTGGCAAAGTCG      |
| Ywhaz_F            | ACTTTTGGTACATTGTGGCTTCAA  |
| Ywhaz_R            | CCGCCAGGACAAACCAGTAT      |
